# Supplementary material for: Non-neutralizing antibodies targeting the immunogenic regions of HIV-1 envelope reduce mucosal infection and virus burden in humanized mice
Source: PubMed Central journal article supplement (PMC8765624; doi:10.1371/journal.ppat.1010183), 2022-01-05
Supplement: ppat.1010183.s001.pdf [file ppat.1010183.s001.pdf]

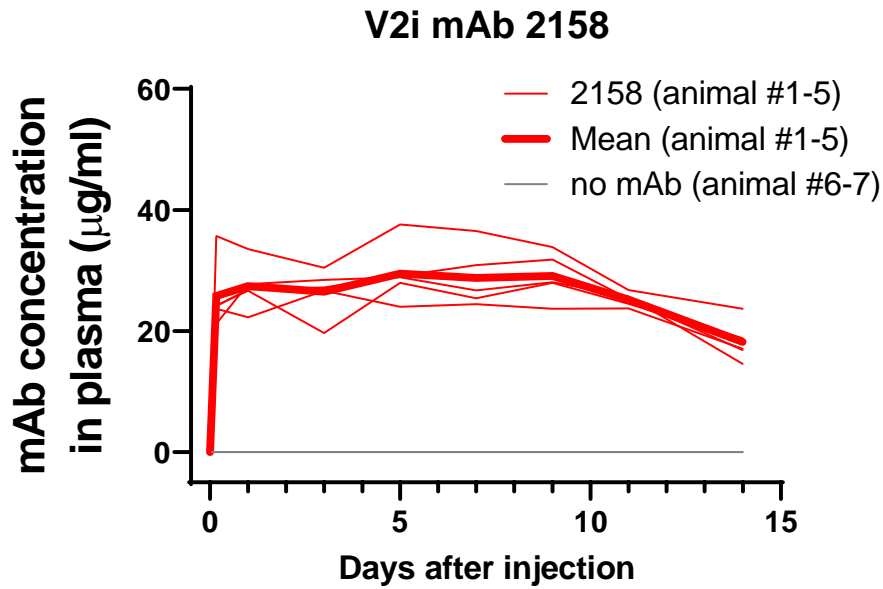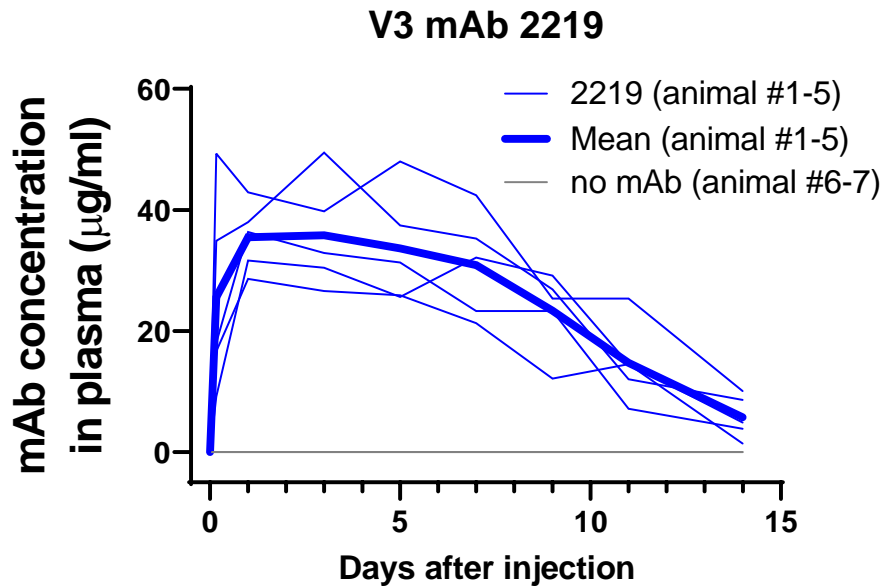

**Fig S1: Pharmacokinetic study of human V2i mAb 2158 and V3 mAb 2219 in NSG mice.**

Each mice was given V2i mAb 2158 and V3 mAb 2219 (700  $\mu\text{g}$  per mAb) intraperitoneally. Plasma was collected and monitored for the concentration of V2i mAb 2158 and V3 mAb 2219 from day 0 to day 14 using ELISA with V1V2-1FD6 or peptide V3 antigens and the respective mAbs as standard. Based on the average values, the half life was estimated to be >14 days for V2i mAb 2158 and 11 days for V3 mAb 2219.
